# Supplementary material
Source: Royal Society of Chemistry journal article supplement (doi:10.1039/d6nj00821f)
Supplement: d6nj00821f1.pdf [file d6nj00821f1.pdf]

## Supporting Information for:

# Comparative electrochemical evaluation of trimetallic Zn-Cu-Mo and Mg-Cu-Mo metal organic frameworks- derived nanocomposites for supercapacitor applications

*Shumaila Rani,<sup>‡,Δ</sup> Muhammad Imran,<sup>\*,†,Δ</sup> Nosheen Yameer<sup>‡</sup>, Huang Jian<sup>†</sup>, Sayed Ali Raza Naqvi,<sup>±</sup> Mariam Liaquat, Qura Tul Ain<sup>†</sup> and Chen Wentong<sup>†</sup>*

<sup>†</sup>Key Laboratory of Jiangxi Province for Special Optoelectronic Artificial Crystal Materials, School of Chemistry and Chemical Engineering, Jingtangshan University, Jian, Jiangxi 343009, PR China. E-mail:

muhammadimran@jgsu.edu.cn (M. I.)

<sup>‡</sup>Department of Physics, The Women University, Multan 60000, Pakistan

<sup>±</sup>Department of Chemistry, Government College University Faisalabad, Faisalabad 38000, Pakistan

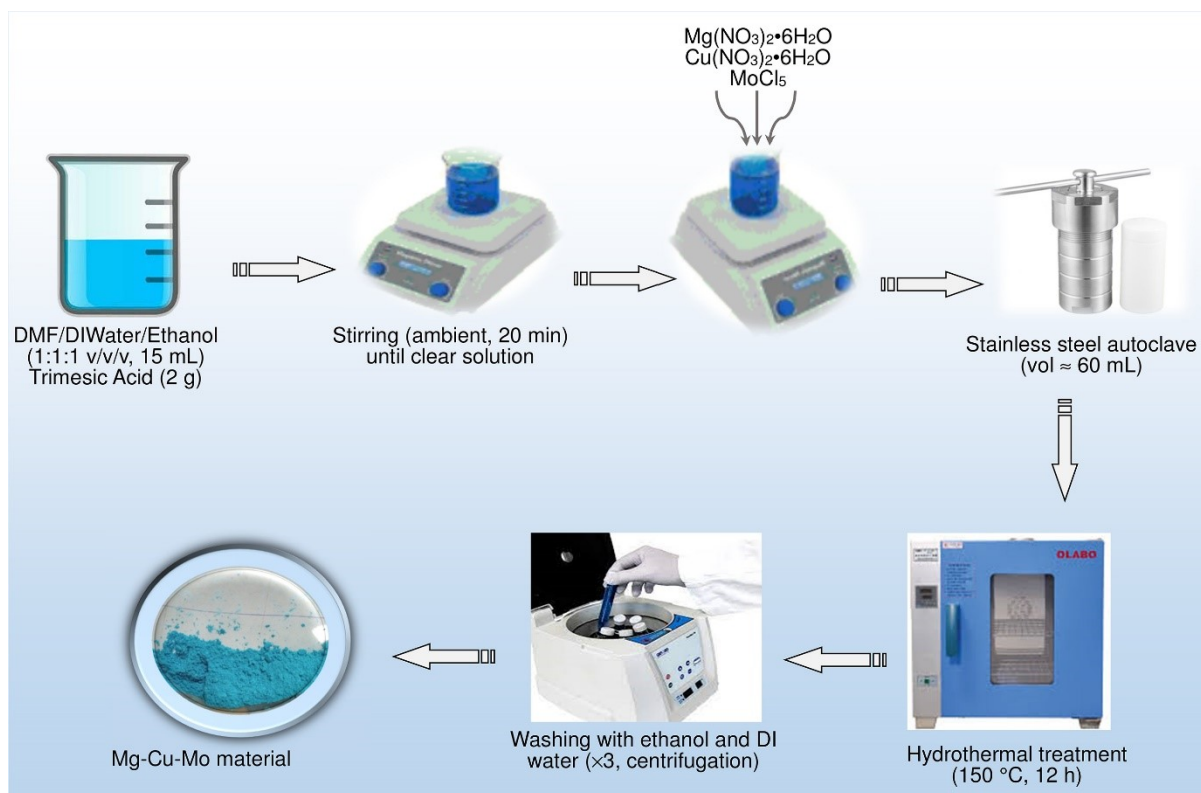

**Fig S1:** Hydrothermal synthesis scheme of Mg-Cu-Mo-MOF

### Calculation of specific capacitance using electrochemical data

The specific capacitance of the fabricated electrode materials was calculated from cyclic voltammetry (CV) curves using the integral area method, which is considered the most accurate approach for capacitance determination. The following equation was employed:

$$C_s = \frac{\int I dV}{2 \times m \times v \times \Delta V} \times 100 \quad \text{Eq. S1}$$

$C_s$  = specific capacitance (F g<sup>-1</sup>)

$I, dV$  = integrated area under the CV curve ( $\text{mA}\cdot\text{V}$ )

$m$  = mass of active material (g) 0.012 g (12 mg) in this study

$\nu$  = scan rate ( $\text{V s}^{-1}$ )

$\Delta V$  = potential window (V); 0.7 V for all measurements

2 = correction factor accounting for both forward and reverse sweeps

100 = normalization factor for unit conversion (from mA to A)

**Table S1.** Specific capacitance values calculated from CV curves for Mg-Cu-Mo-MOF and Zn-Cu-Mo-MOF electrodes at various scan rates.

| Sample   | Area        | Scan Rate<br>(V/s) | Potential Window<br>(V) | Mass<br>(g) | Specific capacitance<br>( $\text{Fg}^{-1}$ ) |
|----------|-------------|--------------------|-------------------------|-------------|----------------------------------------------|
| Mg-Cu-Mo | 0.00303     | 0.1                | 0.7                     | 0.012       | 180                                          |
|          | 2.76E-04    | 0.01               | 0.7                     | 0.012       | 164                                          |
|          | 5.73E-04    | 0.02               | 0.7                     | 0.012       | 165                                          |
|          | 9.01E-04    | 0.03               | 0.7                     | 0.012       | 178                                          |
|          | 0.001247794 | 0.04               | 0.7                     | 0.012       | 185                                          |
|          | 0.001608287 | 0.05               | 0.7                     | 0.012       | 191                                          |
| Zn-Cu-Mo | 0.001039756 | 0.1                | 0.7                     | 0.012       | 61                                           |
|          | 4.80E-04    | 0.01               | 0.7                     | 0.012       | 285                                          |
|          | 9.24E-04    | 0.02               | 0.7                     | 0.012       | 275                                          |
|          | 0.001339485 | 0.03               | 0.7                     | 0.012       | 265                                          |
|          | 0.001723857 | 0.04               | 0.7                     | 0.012       | 256                                          |
|          | 0.001723857 | 0.05               | 0.7                     | 0.012       | 205                                          |

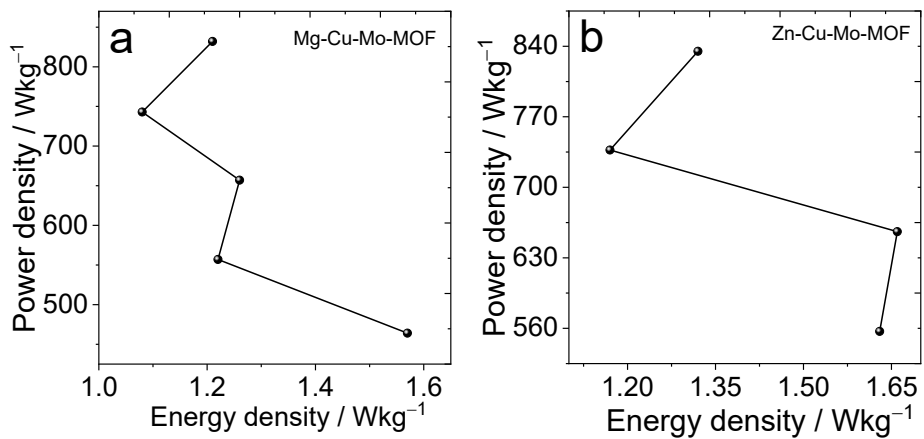

**Fig. S2.** Specific capacitance as a function of power density for (a) Mg-Cu-Mo and (b) Zn-Cu-Mo electrodes.
